# Supplementary material for: Effects of Apamin on MPP+-Induced Calcium Overload and Neurotoxicity by Targeting CaMKII/ERK/p65/STAT3 Signaling Pathways in Dopaminergic Neuronal Cells
Source: MDPI journal article supplement (doi:10.3390/ijms232315255), 2022-12-03

# Effects of apamin on MPP<sup>+</sup>-induced calcium overload and neurotoxicity by targeting CaMKII/ERK/p65/STAT3 signaling pathways in dopaminergic neuronal cells

**Figure S1:** Effects of APM and MPP<sup>+</sup> on viability and morphology of SH-SY5Y cells. SH-SY5Y cells were incubated in the presence or absence of APM for 1 h and then treated with MPP<sup>+</sup> for 24 h. (a) SH-SY5Y cells were treated with MPP<sup>+</sup> (1– to 5 mM) for 24 h and CCK assays were conducted. (b) Cell morphology changes, Magnifications ×200. (c) Changes in TH, αSYN, and Kca2.2 expression according to the concentration of MPP<sup>+</sup>. (d) SH-SY5Y cells were treated with APM (0.1 to 2 μg/ml) for 24 h and CCK assays were conducted. (e) APM significantly increased the viability of MPP<sup>+</sup>-stimulated SH-SY5Y cells. βActin was used to confirm equal sample loading. Immunoblotting was quantified by densitometric analysis. The data are representative of three independent experiments and quantified as mean values ± S.E or SEM (one-way ANOVA and Tukey's multiple comparison test; \* p < 0.05, \*\* p < 0.01, \*\*\* p < 0.001 compared to normal control)

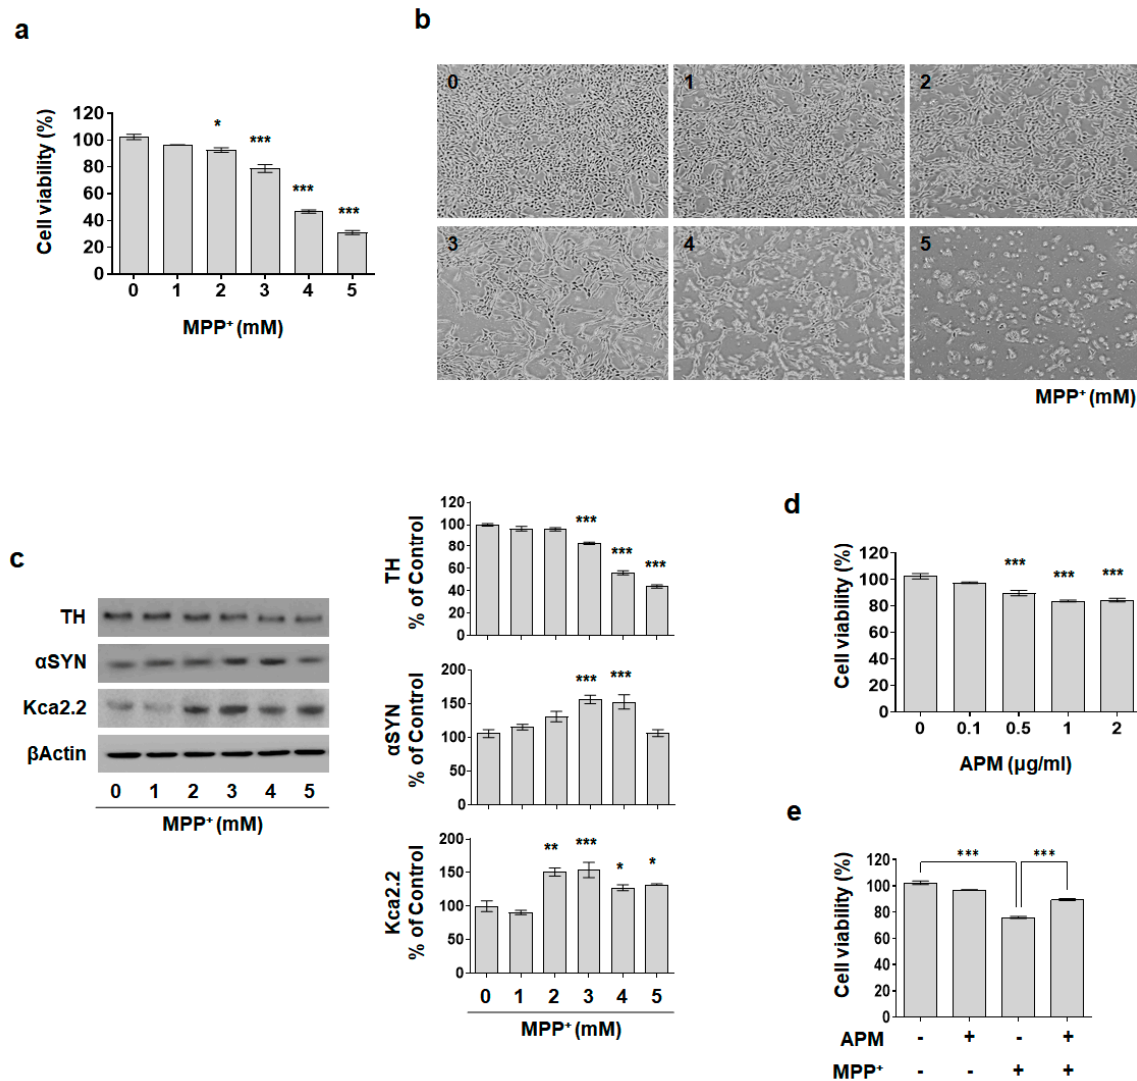

Figure S2: Effects of APM and MPP<sup>+</sup> on viability and morphology of rat embryonic primary mesencephalic neurons. Rat embryonic primary mesencephalic neurons were incubated in the presence or absence of APM for 1 h and then treated with MPP<sup>+</sup> for 24 h. (a) Rat embryonic primary mesencephalic neurons were treated with MPP<sup>+</sup> (10-200  $\mu$ M) for 24 h and CCK assays were conducted. (b) Cell morphology changes, Magnifications  $\times 200$ . (c) Changes in TH,  $\alpha$ SYN, and Kca2.2 expression according to the concentration of MPP<sup>+</sup>. (d) Rat embryonic primary mesencephalic neurons were treated with APM (0.1 to 2  $\mu$ g/ml) for 24 h and CCK assays were conducted. (e) APM significantly increased the viability of MPP<sup>+</sup>-stimulated rat embryonic primary mesencephalic neurons.  $\beta$ Actin was used to confirm equal sample loading. Immunoblotting was quantified by densitometric analysis. The data are representative of three independent experiments and quantified as mean values  $\pm$  S.E or SEM (one-way ANOVA and Tukey's multiple comparison test; \*  $p < 0.05$ , \*\*  $p < 0.01$ , \*\*\*  $p < 0.001$  compared to normal control)

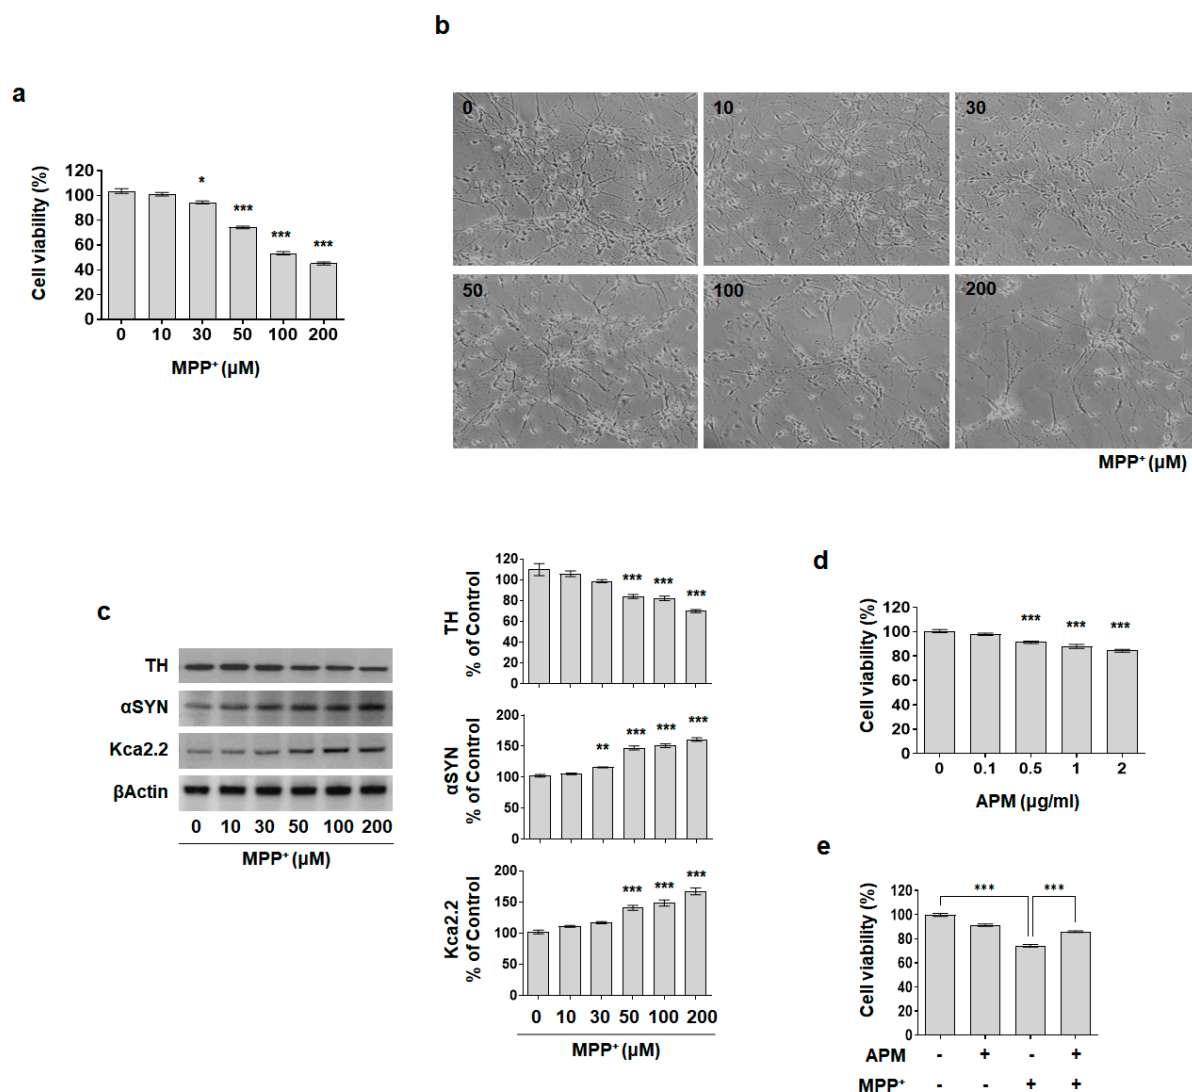

**Figure S3:** Effects of  $\text{Ca}^{2+}$  chelator, BAPTA-AM on  $\text{MPP}^{+}$ -stimulated SH-SY5Y cells. SH-SY5Y cells were treated with APM and BAPTA-AM (5  $\mu\text{M}$ ) for 1 h and then treated with  $\text{MPP}^{+}$  for 24 h. Expression of TH reduction and  $\alpha\text{SYN}$  (a),  $\text{TNF}\alpha$ , NOX2 and CHOP (b) were significantly inhibited in  $\text{MPP}^{+}$ -stimulated SH-SY5Y cells by APM or BAPTA-AM.  $\beta\text{Actin}$  was used to confirm equal sample loading. Immunoblotting was quantified by densitometric analysis. The data are representative of three independent experiments and quantified as mean values  $\pm$  SEM. Tukey's multiple comparison test, \*\*  $p < 0.01$ , \*\*\*  $p < 0.001$  compared to normal control.

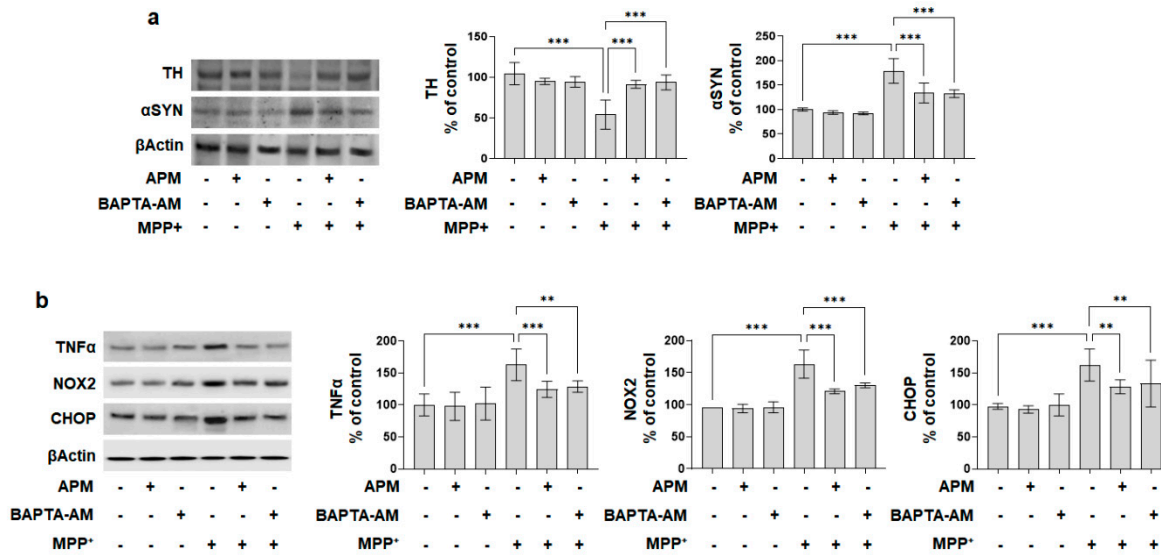

**Figure S4:** APM alleviated MPP<sup>+</sup>-induced neuroinflammatory response. SH-SY5Y cells were treated with APM for 1 h and then treated with MPP<sup>+</sup> for 24 h. Production of TNF $\alpha$ , IL1 $\beta$  and IL6 were analyzed by ELISA (a) and real-time PCR (b) in SH-SY5Y cells. The data are representative of three independent experiments and quantified as mean values  $\pm$  SEM. Tukey's multiple comparison test, \*  $p < 0.05$ , \*\*  $p < 0.01$ , \*\*\*  $p < 0.001$  compared to normal control.

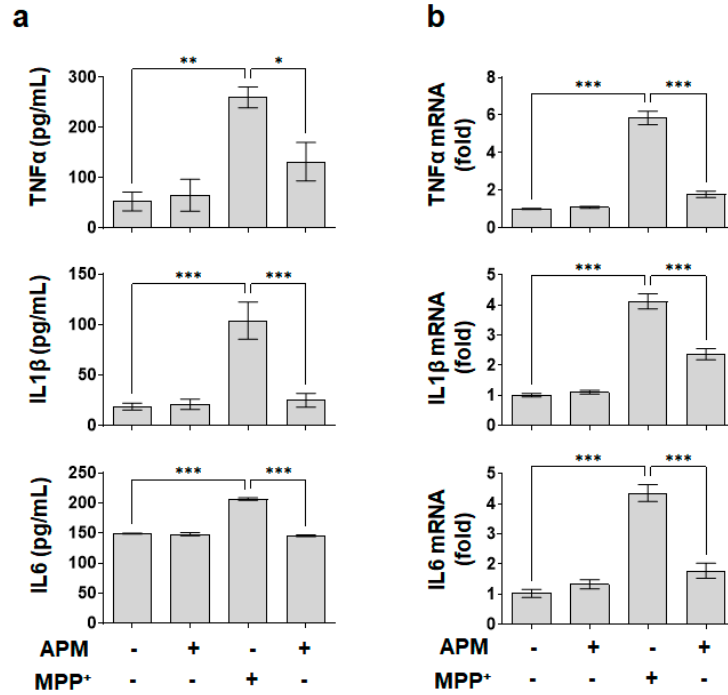

**Figure S5:** Effects of ROS and ER stress on MPP<sup>+</sup>-induced TH reduction, αSYN and Kca2.2 expression. SH-SY5Y cells were treated with APM, an ROS inhibitor, NAC 5 μM and ER stress inhibitor, 4-PBA, 5 μM for 1 h and then treated with MPP<sup>+</sup> for 24 h. Expression of TH reduction, αSYN and Kca2.2 were significantly inhibited in MPP<sup>+</sup>-stimulated SH-SY5Y cells by NAC (A) and 4-PBA (b). βActin was used to confirm equal sample loading. Immunoblotting was quantified by densitometric analysis. The data are representative of three independent experiments and quantified as mean values ± SEM. Tukey's multiple comparison test, \* p < 0.05, \*\* p < 0.01, \*\*\* p < 0.001 compared to normal control.

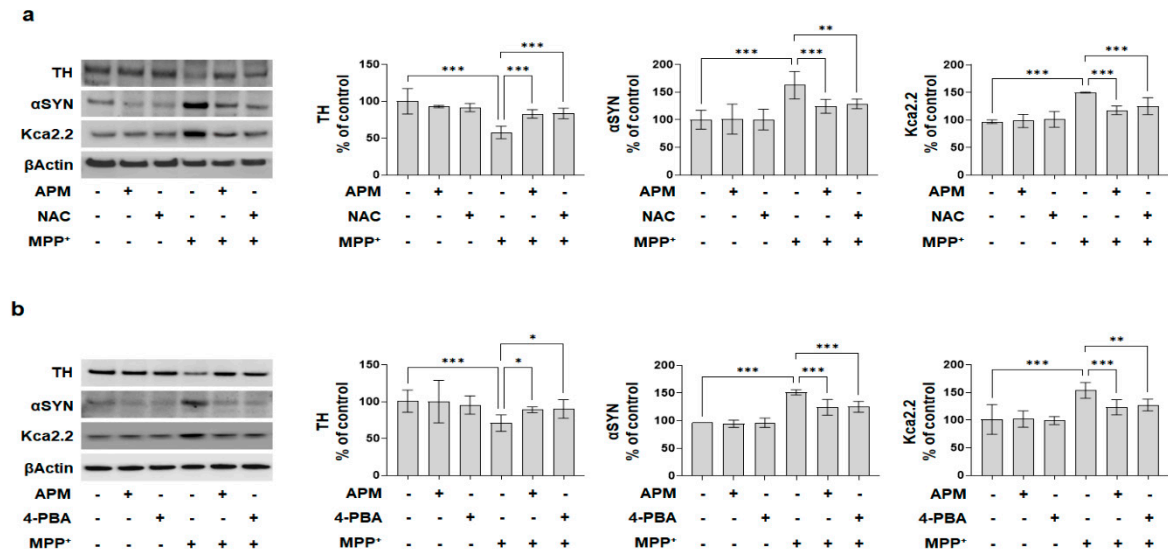

**Figure S6:** APM inhibits the interaction of MAPK-ERK with p65/STAT3 in MPP<sup>+</sup>-induced neurotoxicity. SH-SY5Y cells were treated with an ERK inhibitor (SCH772984, 10  $\mu$ M), a NF $\kappa$ B inhibitor (Bay11-7085, 10  $\mu$ M), STAT3 (S3I-201, 10  $\mu$ M) and APM for 1 h and then treated with MPP<sup>+</sup> 12 h and 24 h. Expression of pp65 and pSTAT3 in nuclear lysate and expression of p65 and STAT3 in cytoplasmic lysate were conducted by immunoblotting. (a) Effects of APM on MPP<sup>+</sup>-induced MAPK-JNK/p38 phosphorylation. MPP<sup>+</sup>-induced TH reduction and  $\alpha$ SYN expression (b), and pp65/pSTAT3 translocation (c) were inhibited when the ERK signal pathway of these cells were downregulated. (d) Bay11-7085 and S3I-201 significantly inhibits MPP<sup>+</sup> induced TH reduction,  $\alpha$ SYN and pERK.  $\beta$ Actin was used to confirm equal sample loading. Immunoblotting was quantified by densitometric analysis. The data are representative of three independent experiments and quantified as mean values  $\pm$  SEM. Tukey's multiple comparison test, \*  $p < 0.05$ , \*\*  $p < 0.01$ , \*\*\*  $p < 0.001$  compared to normal control.

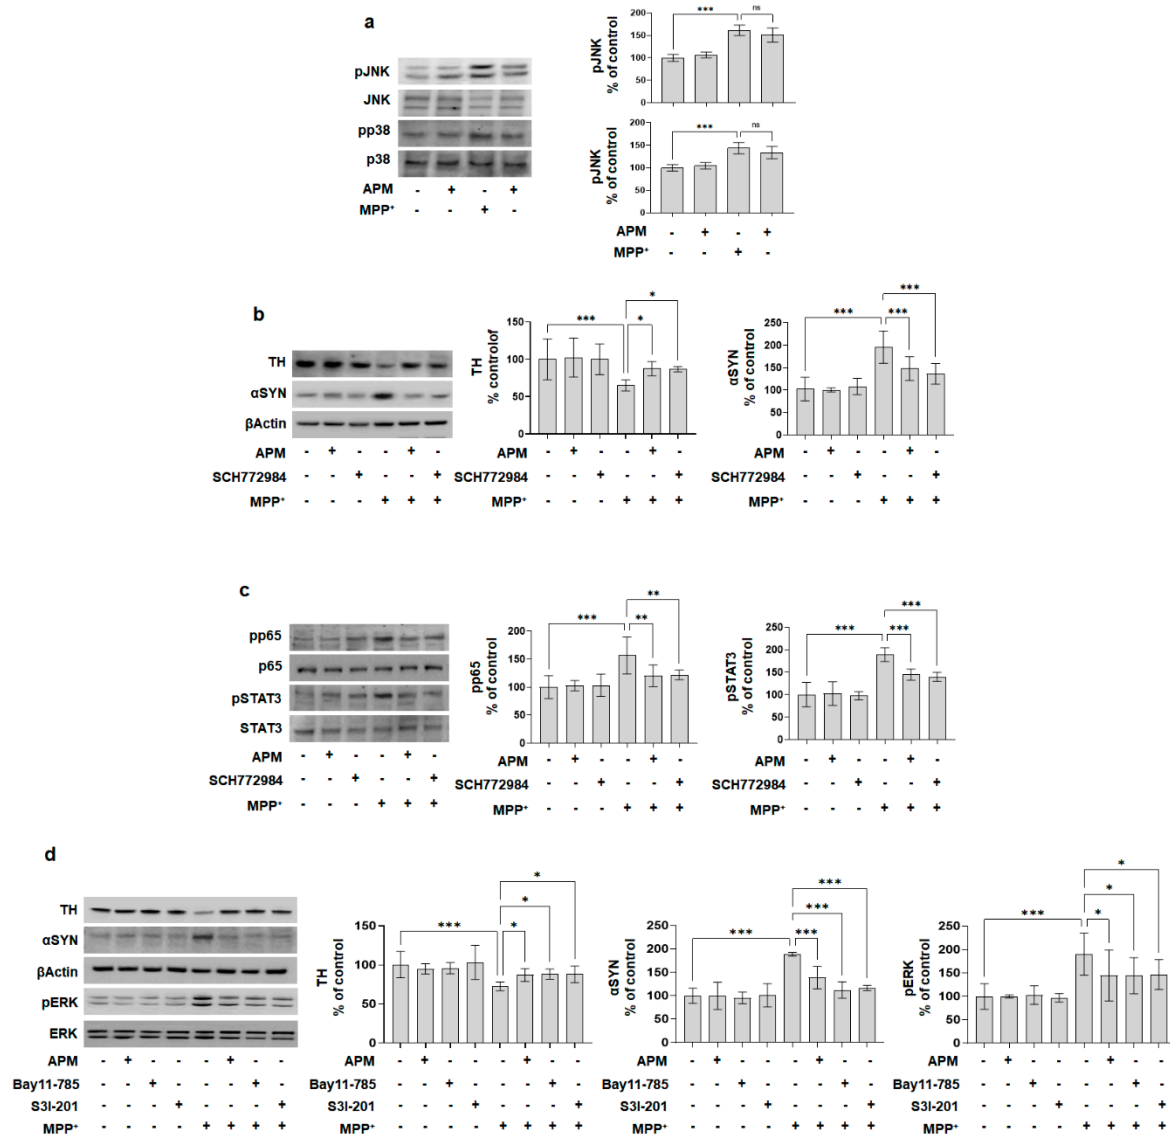

Supplement: s1 [file s1]
